# Supplementary material
Source: PubMed Central journal article supplement (PMC6800187)

# Supplementary Figure 3

**A**

| MEF line                         | Spreads inspected | % Aneuploidy | Karyotypes with indicated chromosome number |    |    |    |    |     |    |    |    |    |    |       |        | %PMSCS | % Breaks |
|----------------------------------|-------------------|--------------|---------------------------------------------|----|----|----|----|-----|----|----|----|----|----|-------|--------|--------|----------|
|                                  |                   |              | ≤35                                         | 36 | 37 | 38 | 39 | 40  | 41 | 42 | 43 | 44 | 45 |       |        |        |          |
| <i>Ccne1</i> <sup>T18</sup> -Dox | 160               | 17           | 0                                           | 0  | 1  | 8  | 7  | 135 | 8  | 1  | 0  | 0  | 0  | 4     | 2      |        |          |
| <i>Ccne1</i> <sup>T18</sup> +Dox | 150               | 40           | 0                                           | 2  | 6  | 8  | 13 | 90  | 18 | 12 | 1  | 0  | 0  | 4     | 7      |        |          |
| <i>Ccne1</i> <sup>T20</sup> -Dox | 150               | 13           | 1                                           | 0  | 0  | 2  | 7  | 130 | 8  | 1  | 1  | 0  | 0  | 5 (2) | 1 (1)  |        |          |
| <i>Ccne1</i> <sup>T20</sup> +Dox | 150               | 27           | 0                                           | 2  | 0  | 6  | 17 | 109 | 13 | 2  | 1  | 0  | 0  | 8 (3) | 13 (5) |        |          |

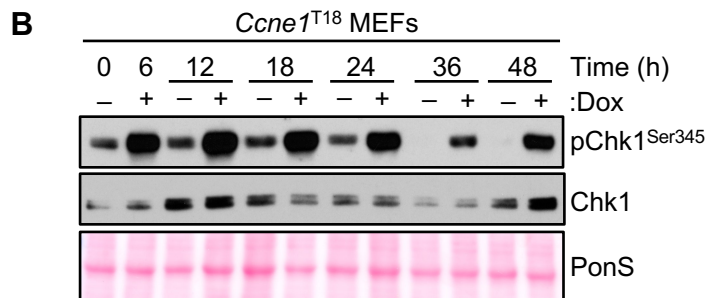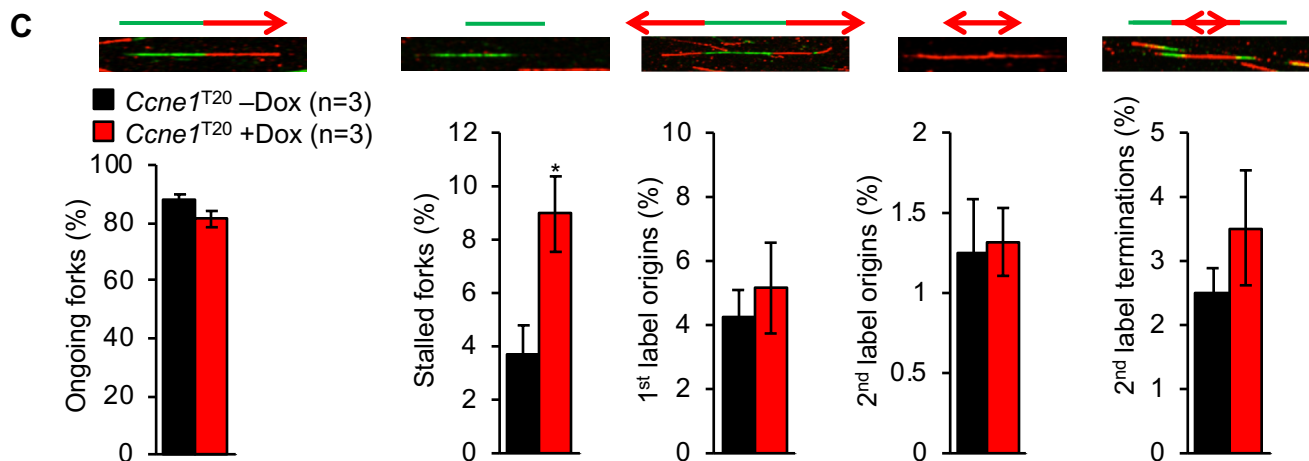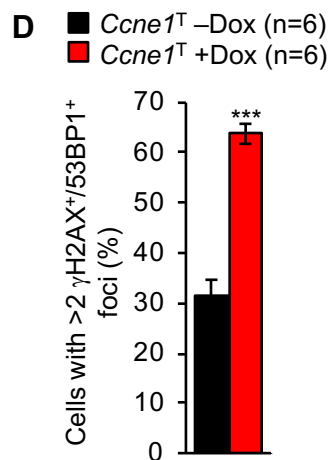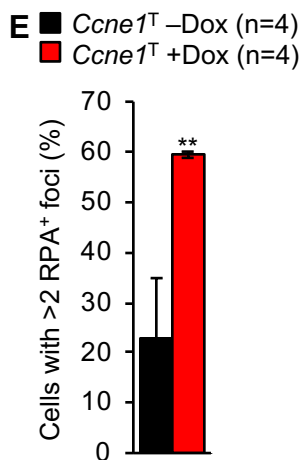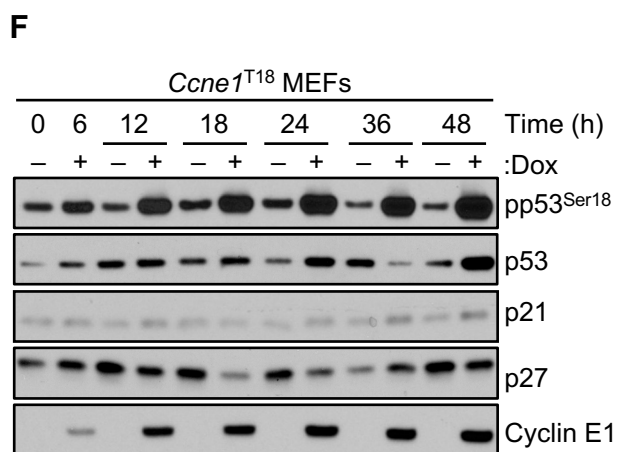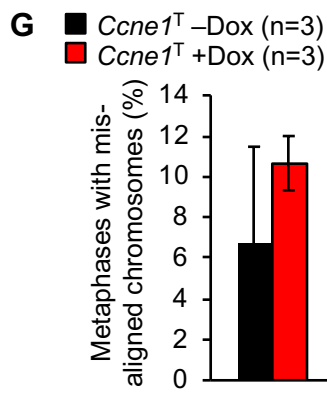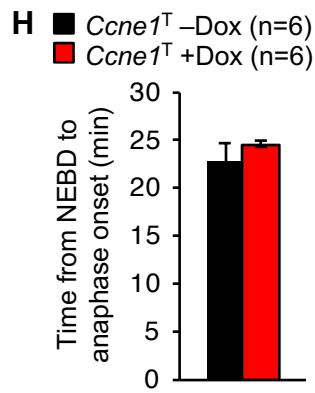

Supplement: NIHMS1531306-supplement-8.pdf [file NIHMS1531306-supplement-8.pdf]
