# Supplementary material
Source: PubMed Central journal article supplement (PMC6800187)
Supplement: NIHMS1531306-supplement-13.pdf [file NIHMS1531306-supplement-13.pdf]

# Supplementary Figure 8

**A** Cell death/survival (↑ DEGs):  
Regulation of apoptotic process annotation

**B** DNA damage/repair (↑ DEGs):  
DNA repair annotation

**C** SASP factors:

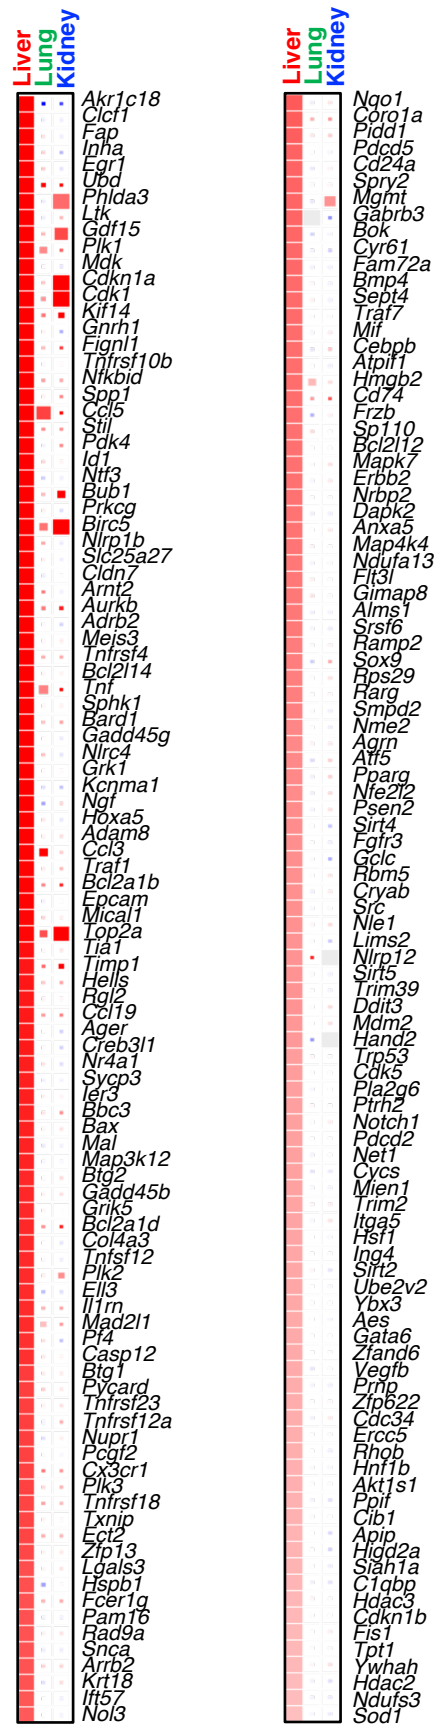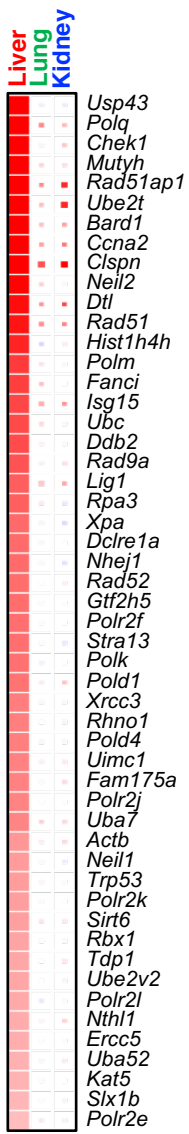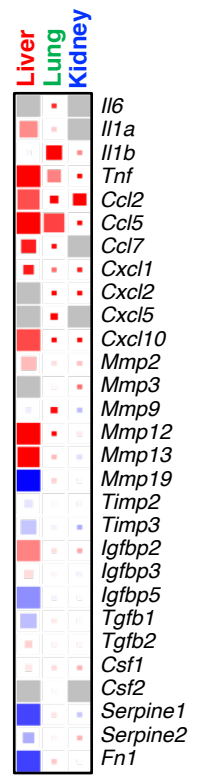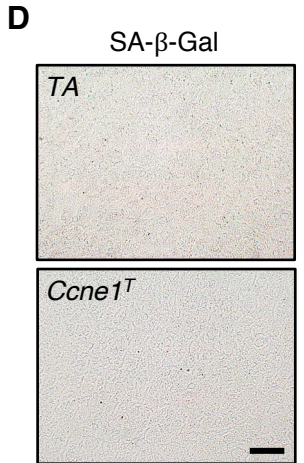

Log<sub>2</sub>FC: -2 (blue) to +2 (red)  
-Log<sub>10</sub>(FDR): >0 (white) to >1.3 (red)  
Not detected: grey
