# Supplementary material
Source: PubMed Central journal article supplement (PMC6800187)

## Supplementary Figure 5

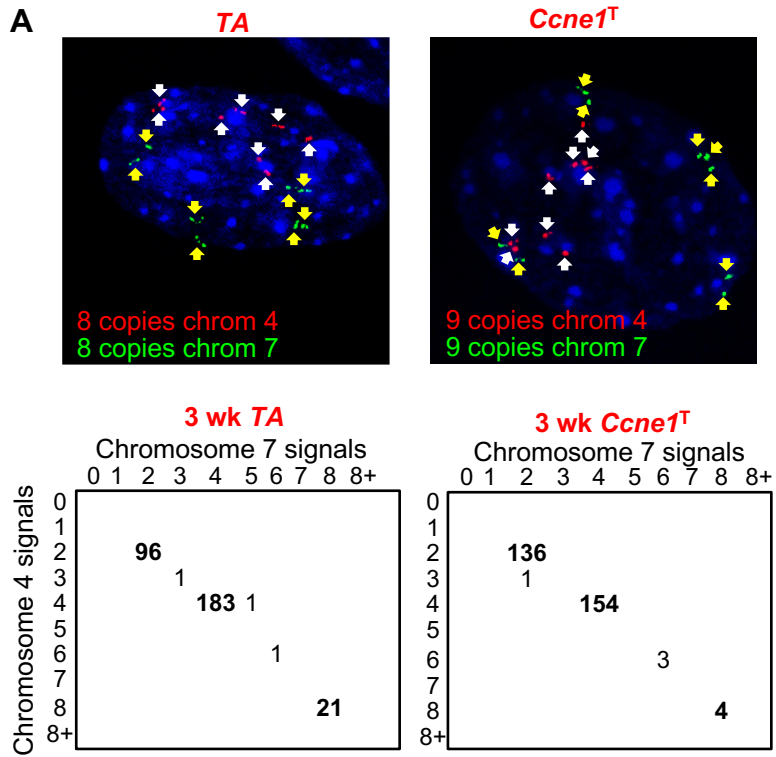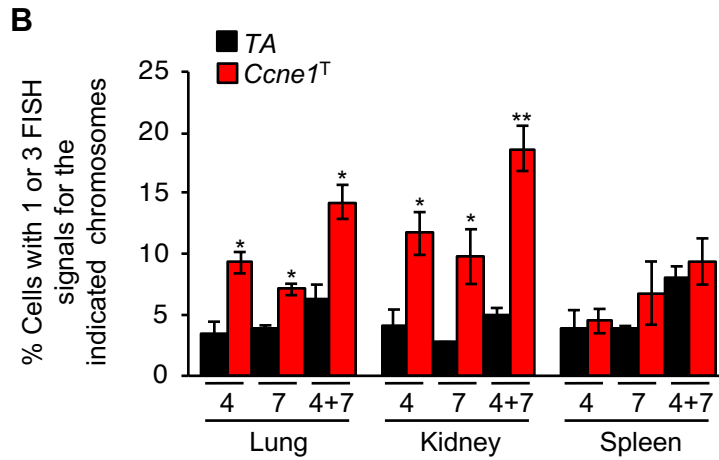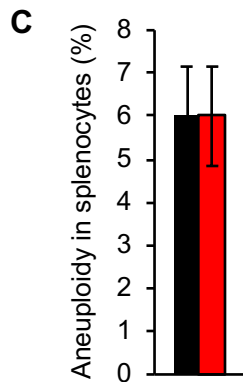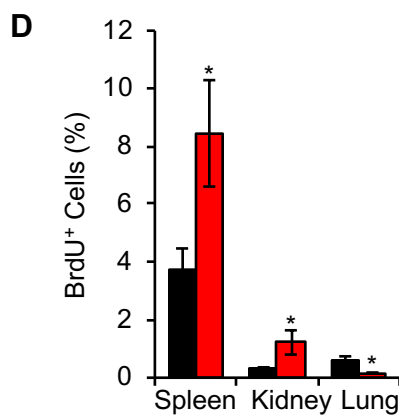

Supplement: NIHMS1531306-supplement-10.pdf [file NIHMS1531306-supplement-10.pdf]

**Supplementary Figure 7**

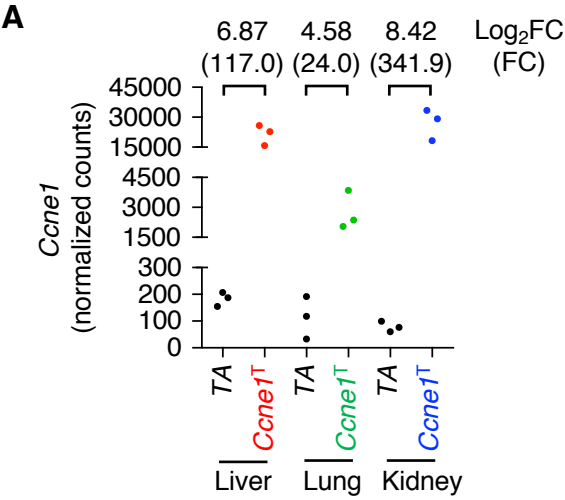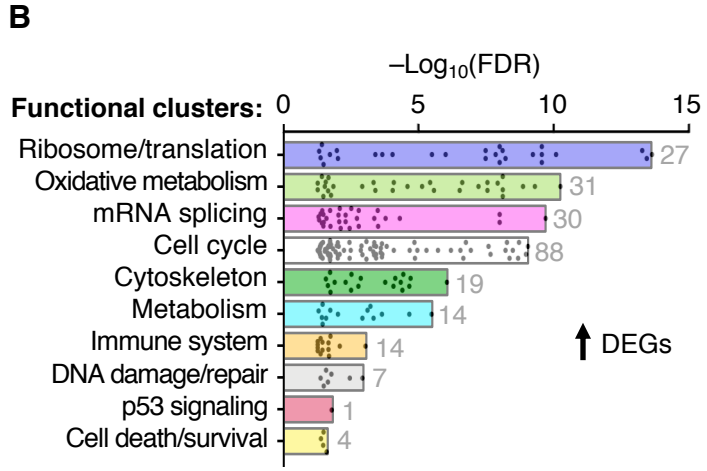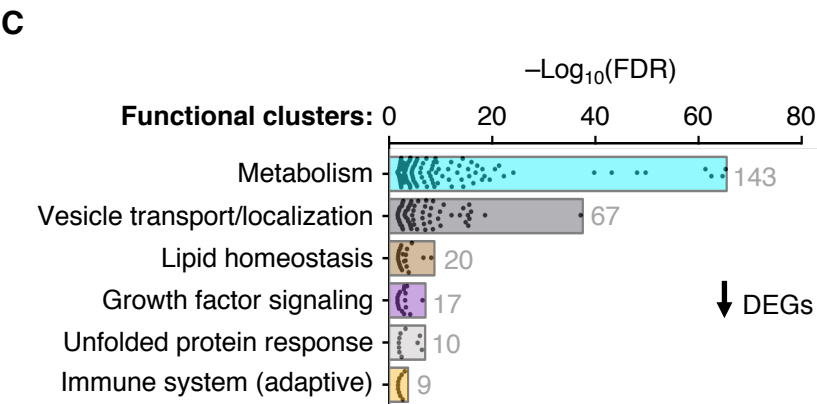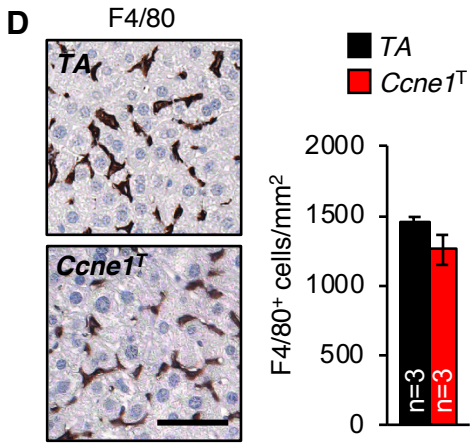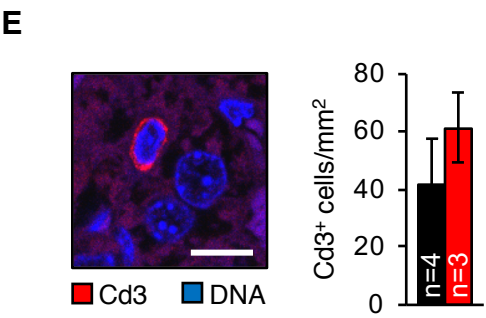

Supplement: NIHMS1531306-supplement-12.pdf [file NIHMS1531306-supplement-12.pdf]

# Supplementary Figure 1

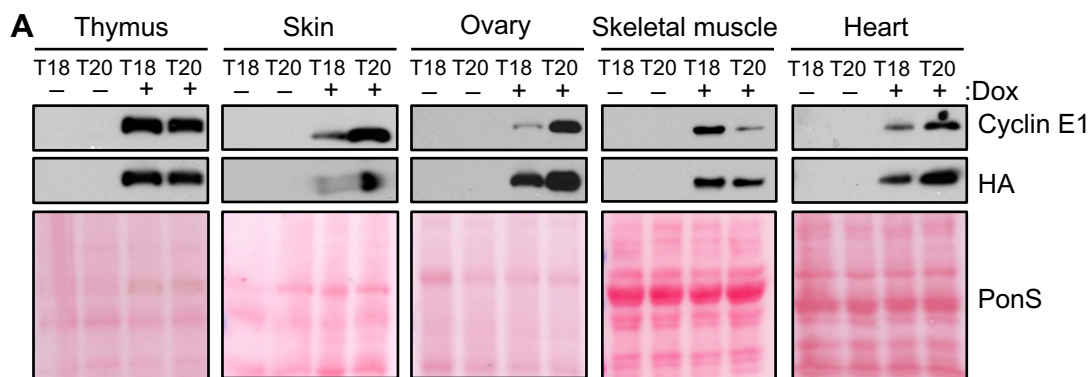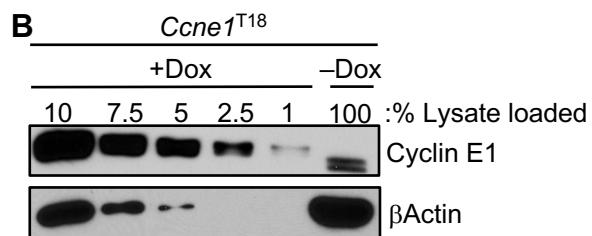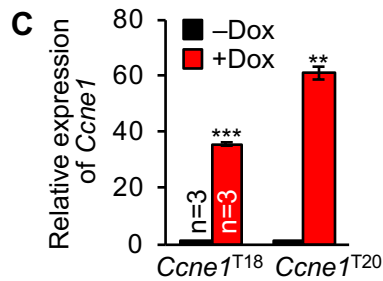

Supplement: NIHMS1531306-supplement-6.pdf [file NIHMS1531306-supplement-6.pdf]

## Supplementary Figure 4

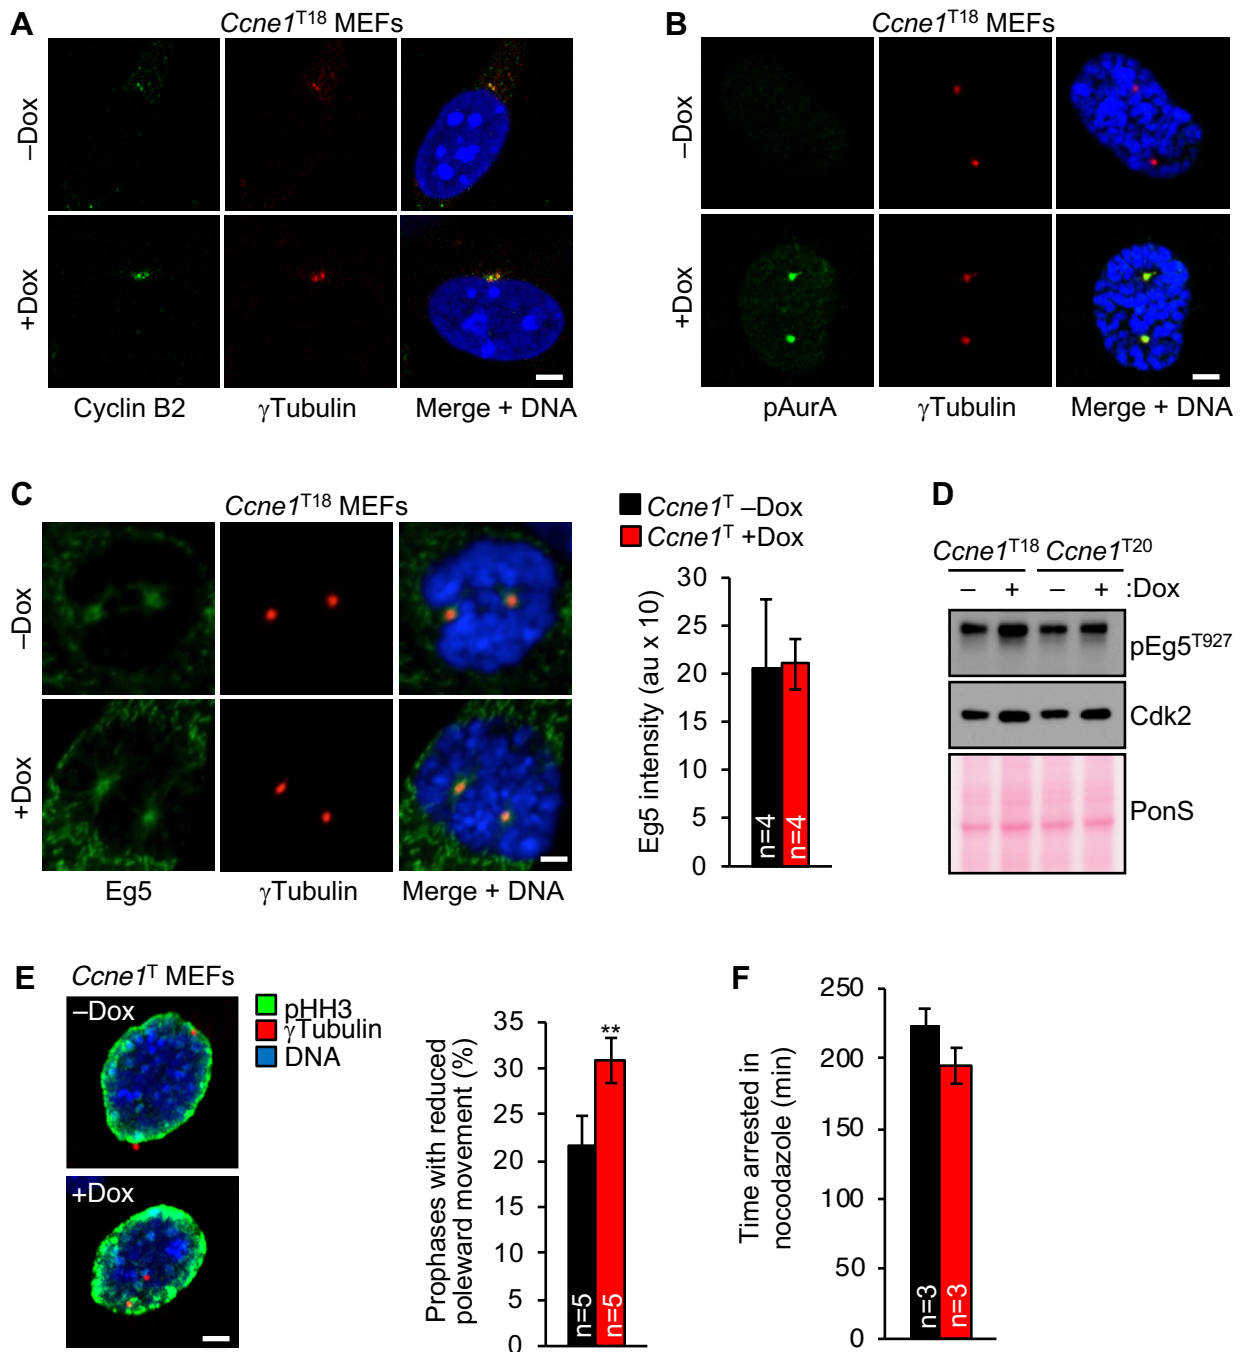

Supplement: NIHMS1531306-supplement-9.pdf [file NIHMS1531306-supplement-9.pdf]
